1 **Accumulation of the GSK3 target protein  $\beta$ -catenin is lethal for B cell**  
2 **precursors and malignant B cells**

3

4 Huda Jumaa<sup>3,4</sup>, Klaus M. Kistner<sup>1,2</sup>, Corinna Setz<sup>5</sup>, M. Mark Taketo<sup>6</sup>, Hassan Jumaa<sup>5</sup>,  
5 Julia Jellusova<sup>1,2,\*</sup>

6

7 <sup>1</sup>Institute of Clinical Chemistry and Pathobiochemistry, School of Medicine, Klinikum  
8 rechts der Isar, Technical University Munich, 81675 Munich

9 <sup>2</sup>TranslaTUM, Center for Translational Cancer Research, Technical University  
10 Munich, 81675 Munich

11 <sup>3</sup>Signalling Research Centres BIOSS and CIBSS, Albert Ludwigs University of  
12 Freiburg, Freiburg, 79104, Germany

13 <sup>4</sup>Department of Molecular Immunology, Institute of Biology III at the Faculty of  
14 Biology, Albert Ludwigs University of Freiburg, Freiburg, 79104, Germany

15 <sup>5</sup> Institute of Immunology, Ulm University Medical Center, 89081, Ulm, Germany

16 <sup>6</sup>Kyoto University Hospital-iACT, Yoshida-Honmachi Sakyo, Kyoto 606-8506, Japan

17

18

19 \* Correspondence: Julia.Jellusova@tum.de

20 Institute of Clinical Chemistry and Pathobiochemistry  
21 Klinikum rechts der Isar  
22 Technical University Munich  
23 Ismaningerstr.22  
24 81675 Munich  
25 Germany

26

27

## 28 **Summary**

29 Glycogen synthase kinase 3 (GSK3) is a ubiquitously expressed kinase involved in a  
30 myriad of biological processes. Although GSK3 mediated phosphorylation has been  
31 shown to induce the degradation of many pro-survival and pro-proliferation factors,  
32 cancer cells of different origin show reduced proliferation or survival after GSK3  
33 inhibition. Our current understanding of the role GSK3 plays in normal mature B  
34 cells, B cell precursors and transformed B cells is incomplete and does not allow to  
35 assess whether GSK3 inhibitors can be used to treat B cell derived malignancies.  
36 Here we identify  $\beta$ -catenin as the major factor driving GSK3-inhibition induced  
37 changes in B cells. We show that  $\beta$ -catenin accumulation has opposing effects on cell  
38 metabolism and survival in mature B cells and B cell precursors. Moreover, we  
39 demonstrate that  $\beta$ -catenin destabilizes the commitment to the B cell lineage. In  
40 summary, our study identifies  $\beta$ -catenin induced signaling as a factor that can be  
41 exploited to limit the survival of malignant B cells.

42

## 43 **Introduction**

44

45 GSK3 is a serine/threonine kinase expressed in  $\alpha$  and  $\beta$  isoforms in most  
46 mammalian tissues. More than 100 substrates are known to be phosphorylated by  
47 GSK3, many of which play important roles in regulating cell metabolism,  
48 proliferation and survival(Sutherland, 2011). GSK3 is an atypical kinase in that it is  
49 constitutively active in resting cells and disabled upon mitogenic stimulation. In  
50 many cell types GSK3 inhibits proliferation by targeting pro-survival and pro-  
51 proliferation factors such as cMyc(Gregory et al., 2003) or  $\beta$ -catenin(Doble et al.,  
52 2007) for degradation. Despite its role in maintaining cellular quiescence in resting  
53 cells, GSK3 has been shown to act both as tumor suppressor and promoter in  
54 different types of cancer(Mancinelli et al., 2017). Conflicting reports exist on the role  
55 of GSK3 in B cell derived lymphoma. Chemical inhibition or genetic deletion of the  
56 GSK3 homologs in different B cell lymphoma lines has been demonstrated to reduce  
57 proliferation and to result in cell cycle arrest(Wu et al., 2019). In contrast, B cell  
58 receptor mediated GSK3 inhibition has been suggested to increase metabolic fitness

59 in a mouse model of Myc-driven lymphoma. GSK3 inhibition supported lymphoma  
60 proliferation and competitive fitness of lymphoma B cells in this model(Varano et  
61 al., 2017). It remains unclear, whether the GSK3-signaling context of the various  
62 lymphoma cells, the use of different chemical compounds with potential side effects,  
63 or the general experimental setup cause the opposing outcomes in these studies. It  
64 is conceivable that GSK3 inhibition has various effects on lymphoma cells depending  
65 on their specific signaling profile or their maturation and developmental status.  
66 Thus in order to harness the full potential of GSK3 inhibitors for B cell lymphoma or  
67 leukemia therapy it is imperative to define the conditions under which GSK3 limits  
68 B cell survival and proliferation and to clarify the molecular mechanisms driving the  
69 phenotype downstream of GSK3.

70 In normal B cells, GSK3 has been shown to play a dual role in B cell proliferation and  
71 survival. GSK3 inhibition in mature activated B cells results in enhanced metabolic  
72 activity, increased oxygen consumption, cell mass accumulation and proliferation if  
73 nutrients are sufficient(Jellusova et al., 2017). However, the viability of GSK3-  
74 deficient B cells is significantly compromised under nutrient restricted conditions in  
75 comparison to their normal counterparts(Jellusova et al., 2017). Additionally, the  
76 inability to inactivate GSK3 has been demonstrated to result in decreased fitness in  
77 response to DNA double strand breaks(Thornton et al., 2016). In conclusion,  
78 whether GSK3 supports or limits mature B cell survival and proliferation appears to  
79 depend on the context highlighting the multifaceted and dynamic nature of GSK3-  
80 dependent signaling.

81 The role of GSK3 in early B cell development has not been described to this date.  
82 Here we analyze how GSK3-inhibition affects B cell precursors, mature B cells and  
83 malignant cells and identify  $\beta$ -catenin as a major factor in determining the  
84 functional outcome of GSK3 inhibition.

85

86

87

88

89

90 **Results**

91

92 **GSK3 inhibition reduces proliferation and survival of malignant B cells**

93

94 To analyze the effect of GSK3 inhibition on B cell derived malignancies, we treated a  
95 panel of lymphoma cells of different origin with the GSK3 inhibitor LY2090314.  
96 Consistent with previous reports(Wu et al., 2019), GSK3 inhibition resulted in  
97 decreased proliferation of lymphoma cells from the lines: Ramos (Burkitt  
98 Lymphoma), Jeko (Mantle Cell Lymphoma) and Mino (Mantle Cell Lymphoma)  
99 (Fig.1A). OCI-Ly7 (Diffuse Large B cell Lymphoma) and OCI-LY19 (Diffuse Large B  
100 cells Lymphoma) cells also showed a slight reduction in proliferation after GSK3  
101 inhibition (Fig.1A). Proliferation of OCI-Ly1 (Diffuse Large B cell Lymphoma) cells  
102 was not affected (Fig.1A). While the viability of the tested lymphoma cells was  
103 largely not affected after 1 day of culture (Fig.S1A), cell survival was significantly  
104 decreased after two days of culture in all cell lines investigated (Fig.1B). To extend  
105 our studies to malignant B cells originating from B cell precursors we transformed  
106 pre B cells with the oncogenic tyrosine kinase BCR-Abl. This fusion protein can  
107 frequently be found in adult acute lymphoblastic leukemia (ALL) patients and is the  
108 product of a chromosomal translocation termed Philadelphia chromosome(El Fakih  
109 et al., 2018; Pear et al., 1998). We treated the transformed cells with LY2090314 to  
110 inhibit GSK3. As expected, GSK3 inhibition in transformed pre B cells resulted in  
111 robust accumulation of the GSK3 target  $\beta$ -catenin (Fig.1C). Similar to lymphoma  
112 cells the proliferation and survival of transformed pre B cells was decreased and cell  
113 death was increased after treatment with LY2090314 (Fig.1D, E).

114

115 **GSK3 plays a context dependent role in B cells**

116

117 In previous studies GSK3-deletion has been found to boost the proliferation of  
118 mature activated B cells(Jellusova et al., 2017) which is in stark contrast to the  
119 phenotype observed in malignant B cells. To rule out general toxicity of LY2090314  
120 and to confirm that GSK3 inhibition causes a similar phenotype as *Gsk3 $\alpha/\beta$*  gene

121 deletion we stimulated mature B cells with anti-CD40+IL-4 and treated them with  
122 the inhibitor. Since the role of GSK3 in B cell precursors has not been defined before,  
123 we included normal, IL-7-dependent B cell precursors in our experiments.  
124 Treatment with LY2090314 resulted in robust  $\beta$ -catenin accumulation in both  
125 mature stimulated B cells and in B cell precursors (Fig.2A, B). Consistent with the  
126 phenotype reported for GSK3-deficient B cells, mature stimulated B cells showed  
127 increased proliferation upon GSK3 inhibition (Fig.2C). In contrast, GSK3-inhibition  
128 reduced the proliferation of B cell precursors (Fig.2D). GSK3 inhibits mitochondrial  
129 activity and reactive oxygen species (ROS) production in mature B cells(Jellusova et  
130 al., 2017). To test whether changes in the proliferative rate after GSK3 inhibition are  
131 associated with altered mitochondrial activity we measured oxygen consumption  
132 and ROS production after GSK3 inhibition. We found basal oxygen consumption,  
133 spare respiratory capacity and ROS production to be increased in mature B cells  
134 after GSK3 inhibition. However, these parameters were decreased in B cell  
135 precursors (Fig.2E, F, G, H). Similar to normal B cell precursors, transformed B cell  
136 precursors showed reduced oxygen consumption and ROS production after GSK3-  
137 inhibition (Fig.2I, J). Notably, while oxygen consumption was reduced, glucose  
138 uptake was increased after GSK3 inhibition (Fig.2K) suggesting that not all  
139 metabolic pathways are blocked by GSK3 inhibition. In summary our results show  
140 that GSK3 inhibition has different effects on normal mature B cells vs. malignant B  
141 cells and B cell precursors.

142

#### 143 **$\beta$ -catenin but not cMyc accumulates after GSK3 inhibition in malignant B cells**

144

145 Reduced mitochondrial activity in GSK3-inhibited malignant B cells and B cell  
146 precursors was surprising considering that GSK3 deletion/inhibition has been  
147 reported to increase signaling through  $\beta$ -catenin, cMyc and mTORC1 (Doble et al.,  
148 2007; Gregory et al., 2003; Inoki et al., 2006) which are central regulators of cell  
149 metabolism (El-Sahli et al., 2019; Miller et al., 2012; Saxton and Sabatini, 2017). To  
150 identify the molecular mechanisms of reduced mitochondrial activity upon GSK3-  
151 inhibition we assessed the protein levels of  $\beta$ -catenin and cMyc as well as S6

152 phosphorylation, which is a readout of mTORC1 signaling. Similar to what has been  
153 reported for GSK3-deficient B cells(Jellusova et al., 2017), mature B cells showed  
154 some accumulation of cMyc after GSK3 inhibition and no changes in S6  
155 phosphorylation (Fig.3A). In contrast, we found the levels of cMyc and pS6 to be  
156 reduced after GSK3 inhibition in normal and transformed B cell precursors  
157 (Fig.3B,C). Similarly, we found  $\beta$ -catenin to accumulate in all cell lines investigated  
158 (Fig.3D). cMyc and pS6 levels remained either constant or were reduced after GSK3  
159 inhibition (Fig.3D). In summary our findings demonstrate that the bona fide GSK3  
160 target cMyc does not accumulate in B cell precursors and malignant B cells treated  
161 with the GSK3 inhibitor.

162

#### 163 **Accumulation of $\beta$ -catenin interferes with B cell development**

164

165 Myc is a direct target of GSK3, described to be stabilized after GSK3  
166 inhibition(Gregory et al., 2003), yet failed to accumulate in GSK3 inhibited  
167 malignant B cells and B cell precursors. Thus we reasoned that the overall reduction  
168 of cMyc proteins levels and S6 phosphorylation are secondary to cell death signals  
169 induced by a different GSK3 target molecule. Since we found  $\beta$ -catenin to  
170 accumulate consistently in all analyzed B cell subsets we hypothesized that  $\beta$ -  
171 catenin plays a central role in orchestrating GSK3-dependent signaling. To analyze  
172 the effect of  $\beta$ -catenin accumulation on B cell function, we employed a mouse model  
173 in which exon 3 of the  $\beta$ -catenin gene is flanked by loxP alleles and deleted upon Cre  
174 enzyme activity (*bCat<sup>LoxEx3</sup>*)(Harada et al., 1999). The resulting mutant protein  
175 cannot be phosphorylated by GSK3 anymore and accumulates in the cells. To induce  
176  $\beta$ -catenin accumulation in mature B cells, we crossed the *bCat<sup>LoxEx3</sup>* mice to *Mb1-*  
177 *Cre<sup>ERT2</sup>* mice(Hobeika et al., 2015; Hug et al., 2014). *bCat<sup>LoxEx3</sup> x Mb1-Cre<sup>ERT2</sup>* mice  
178 were injected with tamoxifen to induce Cre activity in B cells. Mature B cells  
179 obtained from these mice were stimulated with anti-CD40 and IL-4. Analysis of  $\beta$ -  
180 catenin protein levels showed that the majority of B cells accumulated higher levels  
181 of  $\beta$ -catenin than control B cells (Fig.4A). Anti-CD40+IL-4 stimulated B cells from  
182 *bCat<sup>LoxEx3</sup> x Mb1-Cre<sup>ERT2</sup>* mice showed increased proliferation (Fig.4B), oxygen

183 consumption (Fig.4C) and ROS production (Fig.4D) in comparison to cells from  
184 control mice, demonstrating that  $\beta$ -catenin accumulation phenocopies GSK3-  
185 inhibition induced changes in B cell biology. To analyze the role of  $\beta$ -catenin in B cell  
186 development *bCat<sup>LoxEx3</sup>* mice were crossed to *Mb1-Cre* mice(Hobeika et al., 2006). In  
187 this mouse model exon 3 of the  $\beta$ -catenin gene is deleted beginning at the pro B cell  
188 stage. To analyze B cell development and survival upon  $\beta$ -catenin accumulation, we  
189 first assessed the B cell compartment in peripheral lymphoid organs. We found the  
190 number of B220-positive cells to be dramatically reduced in the spleen, the lymph  
191 nodes and the payers patches (Fig.4E, F and S2A, B, C). Analysis of the expression of  
192 maturation markers CD21 and CD23 revealed that few mature B cells (CD21<sup>int</sup>,  
193 CD23<sup>high</sup>) reached the periphery (Fig.4G). Similar to peripheral lymphoid organs,  
194 mature recirculating B cells (CD43<sup>-</sup>, B220<sup>high</sup>, IgM<sup>+</sup>) were nearly completely absent  
195 from the bone marrow of *bCat<sup>LoxEx3</sup> x Mb1-Cre* mice (Fig.4H, I). The numbers of small  
196 pre B cells (CD43<sup>-</sup>, B220<sup>low</sup>, IgM<sup>-</sup>) and immature B cells (CD43<sup>-</sup>, B220<sup>low</sup>, IgM<sup>+</sup>) were  
197 also significantly reduced in *bCat<sup>LoxEx3</sup> x Mb1-Cre* mice in comparison to control mice  
198 (Fig.4H, I). In contrast, the total cell numbers of pro B cells (CD43<sup>+</sup>, B220<sup>low</sup>, IgM<sup>-</sup>,  
199 BP1<sup>-</sup>) and large pre B cells (CD43<sup>+</sup>, B220<sup>low</sup>, IgM<sup>-</sup>, BP1<sup>+</sup>) were slightly but not  
200 significantly reduced (Fig.4I, J), suggesting that  $\beta$ -catenin accumulation blocks B cell  
201 development at the pre B cell stage.

202

### 203 **Accumulation of $\beta$ -catenin induces cell death in B cell precursors**

204

205 Large pre B cells represent a highly proliferative population of cells and need to  
206 become quiescent in order to progress in their development(Herzog et al., 2009). To  
207 test whether  $\beta$ -catenin accumulation drives excess proliferation in B cell precursors  
208 we made use of an experimental setup in which B cell development from  
209 hematopoietic stem cells is induced *in vitro* through the sequential withdrawal of  
210 the cytokines Flt3-L and SCF and simultaneous activation with IL-7(Baracho et al.,  
211 2014). 6-8 days after Flt3-L and SCF withdrawal, the resulting IL-7 dependent cell  
212 culture from control bone marrow cells consisted predominantly of B220<sup>+</sup>CD19<sup>+</sup> B  
213 cell precursors (Fig.5A, B). In contrast, significantly fewer B220<sup>+</sup> cells were

214 observed in samples originating from bone marrow obtained from *bCat<sup>LoxEx3</sup> x Mb1-*  
215 *Cre* mice (Fig.5A, B). Moreover, while virtually all B220+ cells from control bone  
216 marrow co-expressed CD19, on average only 27% of the cells from *bCat<sup>LoxEx3</sup> x Mb1-*  
217 *Cre* bone marrow were CD19-positive (Fig.5C). This suggests that B cell  
218 development is disrupted after  $\beta$ -catenin accumulation. After analyzing cell cycle  
219 distribution of the cultured B cells, we found the frequency of cells in the G1/G0  
220 phase to be significantly increased and the frequency of cells in the S phase to be  
221 significantly decreased among B cells from *bCat<sup>LoxEx3</sup> x Mb1-Cre* bone marrow  
222 (Fig.5D), suggesting that B cells with accumulated  $\beta$ -catenin undergo cellular  
223 quiescence or apoptosis. To assess whether  $\beta$ -catenin accumulation decreases cell  
224 viability we stained for active caspase 3 and found the frequency of apoptotic cells  
225 to be significantly increased in the population of B220+ *bCat<sup>LoxEx3</sup> x Mb1-Cre* cells  
226 (Fig.5E). In summary, these results demonstrate that unlike in mature B cells,  $\beta$ -  
227 catenin in B cell precursors leads to cell cycle arrest and apoptosis.

228 Our data demonstrate that similarly to GSK3-inhibited cells, *bCat<sup>LoxEx3</sup>* B cell  
229 precursors show reduced proliferation and increased cell death. To further confirm  
230 that  $\beta$ -catenin accumulation is a major factor mediating the phenotype observed  
231 after GSK3 inhibition, we measured glucose uptake and ROS production in *bCat<sup>LoxEx3</sup>*  
232 *x Mb1-Cre* B cell precursors. Similar to transformed B cell precursors (Fig.2I) and  
233 normal B cell precursors (Fig.2H) treated with LY2090314, *bCat<sup>LoxEx3</sup> x Mb1-Cre* B  
234 cell precursors showed reduced ROS production in comparison to control cells  
235 (Fig.5F). Furthermore, glucose uptake of *bCat<sup>LoxEx3</sup> x Mb1-Cre* pre B cells was  
236 increased in comparison to control B cells (Fig.5G). An increase in glucose uptake  
237 was also observed in transformed B cell precursors after LY2090314 treatment  
238 (Fig.2K). In summary, our data suggest that  $\beta$ -catenin accumulation is a major  
239 driving force inhibiting mitochondrial function and survival of B cell precursors  
240 after GSK3-inhibition.

241

242 **Accumulation of  $\beta$ -catenin disrupts the B cell gene expression profile in B cell**  
243 **precursors**

244



245  $\beta$ -catenin can fulfill two separate functions in cells, it can act as a transcriptional co-  
246 activator and as a coordinator of cell-cell adhesion (Valenta et al., 2012). To confirm  
247 that  $\beta$ -catenin induces changes in the transcriptional profile and to assess which  
248 gene clusters are affected by  $\beta$ -catenin stabilization in B cell precursors, we  
249 performed transcriptome analysis of B220-positive control and *bCat<sup>LoxEx3</sup>* B cell  
250 precursors. Since B220-positive *bCat<sup>LoxEx3</sup>* B cell precursors do not represent a  
251 homogeneous population as part of them are CD19 positive and part of them are  
252 CD19 negative we also treated wildtype B cell precursors with LY2090314 over  
253 night and compared them to untreated samples. We performed principal component  
254 analysis (PCA) of the obtained transcriptomes and found that samples obtained  
255 from *bCat<sup>LoxEx3</sup>* B cell precursor cultures clustered together and were clearly  
256 separated from the control cells (Fig.6A). Similarly, PCA showed a distinct grouping  
257 of LY2090314 treated and untreated samples (Fig.6A). The control B cells from the  
258 first set of experiments and the untreated samples from the second set of  
259 experiments were similar, but not identical in their transcription profile. The control  
260 B cells from the first set of experiments were positively sorted for B220 expression,  
261 while the untreated cells from the second set of experiments were not sorted prior  
262 RNA isolation. These small differences in the experimental setup could possibly  
263 explain the observed variations in gene expression profiles between these two sets  
264 of samples. The transcription profile of *bCat<sup>LoxEx3</sup>* B cell precursors differed from the  
265 transcription profile of LY2090314 treated B cell precursors (Fig.6C), which is  
266 expected considering that GSK3 has many other targets beyond  $\beta$ -catenin. However,  
267 when we analyzed the set of genes that were significantly upregulated in *bCat<sup>LoxEx3</sup>* B  
268 cell precursors when compared to control cells and the set of genes significantly  
269 upregulated in LY2090314 treated B cell precursors when compared to untreated  
270 cells, we found an overlap of 433 genes (Supplementary table 1 and 2). This set  
271 included genes involved in different biological processes such as Wnt signaling and  
272 cell differentiation (Supplementary table 3). Of note, we found the expression of  
273 *Prdm1*, the gene encoding the differentiation factor Blimp1 to be significantly  
274 upregulated in both GSK3-inhibited and *bCat<sup>LoxEx3</sup>* B cell precursors in comparison to  
275 their respective controls. Moreover, *Pax5* expression was significantly reduced after

276 GSK3 inhibition. Similarly, there was a trend towards reduced *Pax5* expression in  
277 *bCat<sup>LoxEx3</sup>* B cell precursors. PAX5 is a transcription factor defining the B cell lineage  
278 (Cobaleda et al., 2007) and Blimp1 is a transcription factor known to drive plasma  
279 cell differentiation in mature B cells, but cell death in B cell precursors (Setz et al.,  
280 2018). Thus our data indicate that the induction of the GSK3/ $\beta$ -catenin signaling  
281 axis destabilizes B cell identity. To verify the results obtained from the  
282 transcriptome analysis we first measured Pax5 protein levels in *bCat<sup>LoxEx3</sup>* B cell  
283 precursors obtained from hemopoietic stem cell cultures. At day 11 of culture the  
284 majority of WT cells expressed the B cell marker B220 and were Pax5 positive  
285 (Fig.6B, C). In contrast, the cultures obtained from *bCat<sup>LoxEx3</sup>* hematopoietic stem  
286 cells contained only few B220-positive cells (Fig.6B). These cultures also contained  
287 a second population of B220-low cells that was not seen in the WT sample. Both  
288 B220-low and B220-positive cells from the *bCat<sup>LoxEx3</sup>* culture contained only slightly  
289 higher Pax5 levels than B220-negative cells (Fig.6C). These results thus confirm that  
290 Pax5 expression is reduced in response to  $\beta$ -catenin accumulation. Moreover both  
291 B220-positive and B220-low *bCat<sup>LoxEx3</sup>* cells expressed higher Blimp1 protein levels  
292 than B220-positive wildtype cells (Fig.6D). To test whether  $\beta$ -catenin accumulation  
293 can disrupt the gene expression profile defining B cell identity in already established  
294 B cell precursors, we treated wildtype CD19+ B220+ B cell precursors overnight  
295 with LY2090314 and analyzed Pax5 and Blimp1 expression. Strikingly, we found  
296 Pax5 expression to be reduced and Blimp1 expression to be increased after GSK3  
297 inhibition (Fig.6E, F). Similar to normal B cell precursors we found Blimp1  
298 expression to increase upon GSK3 inhibition in transformed B cell precursors  
299 (Fig.6G) Blimp1 has been reported to induce cell death of B cell precursors (Setz et  
300 al., 2018). To test whether Blimp1 is primarily responsible for inducing apoptosis  
301 after GSK3 inhibition, we treated control and *Prdm1*-deficient B cell precursors with  
302 LY2090314. GSK3 inhibition induced cell death in both WT and *Prdm1*-deficient B  
303 cell precursors suggesting that  $\beta$ -catenin has other detrimental effects on cell  
304 survival in addition to driving Blimp1 expression (Fig.6H). In our search of  
305 additional factors deregulated downstream of  $\beta$ -catenin we found the protein levels  
306 of the transcriptional factor Foxo1 to be reduced after GSK3 inhibition in both

307 normal and transformed B cell precursors (Fig.6I, J). Foxo1 is a transcription factor  
308 that not only governs essential steps in B cell development but has also been shown  
309 to be crucial for the survival and cell cycle progression of acute B cell  
310 leukemia(Alkhatib et al., 2012; Dengler et al., 2008; Wang et al., 2018). In conclusion  
311 these results demonstrate that  $\beta$ -catenin stabilization not only alters the metabolic  
312 profile of B cell precursors but also induces a transcription profile that reverts  
313 lineage fate decisions.

314

## 315 **Discussion**

316

317 B cell derived lymphomas are the most common malignant lymphoid neoplasms  
318 (Küppers, 2005; Young and Staudt, 2013) and new strategies are required to treat  
319 refractory disease. GSK3 has emerged as a potential new target for medical  
320 intervention in different types of cancer. Owing to the complexity of the signaling  
321 processes governed by GSK3 it remains however difficult to predict the biological  
322 outcome of GSK3 inhibition in B cell derived malignancies. Inactivation of genes  
323 encoding both of the GSK3 isoforms results in enhanced oxygen consumption, cell  
324 mass accumulation and proliferation in mature stimulated B cells(Jellusova et al.,  
325 2017). This phenotype is consistent with the accumulation of the transcription  
326 factors cMyc and  $\beta$ -catenin in these cells. Both of these transcription regulators have  
327 been shown before to support a transcription profile favoring increased metabolic  
328 activity(Dang, 2013; Sherwood, 2015). Similar to mature stimulated cells, B cell  
329 lymphoma cells have been shown to benefit from GSK3 inhibition(Varano et al.,  
330 2017). Signals originating from the B cell receptor have been suggested to result in  
331 GSK3 inhibition, which in turn increases the competitive fitness of the cells(Varano  
332 et al., 2017). These findings would thus discourage the use of GSK3 inhibitors for B  
333 lymphoma treatment. However, other studies have found GSK3 inhibition to  
334 successfully inhibit lymphoma B cell proliferation(Wu et al., 2019). In our study we  
335 have confirmed that GSK3 inhibition reduces proliferation and survival in  
336 lymphoma cells. The role of GSK3 in transformed B cell precursors has not been  
337 studied before and our results demonstrate for the first time that GSK3 inhibition

338 reduces metabolic activity and proliferation of transformed B cell precursors. Thus  
339 we have identified a possible new target that could be exploited for therapy in of B  
340 cell precursor acute lymphoblastic leukemia.

341 Moreover, we show that while GSK3 inhibition induces increased mitochondrial  
342 activity and faster proliferation in mature stimulated B cells, this treatment exerts  
343 the opposing effect on B cell precursors arguing for a context dependent role of  
344 GSK3 in B cells. GSK3 possesses a plethora of potential targets and teasing apart the  
345 role of these various proteins is essential in order to be able to identify patients that  
346 could benefit from GSK3 inhibition. GSK3 has been shown to bind to centrosomes  
347 and suggested to play an important role in cell cycle progression(Wu et al., 2019).  
348 While it is possible that GSK3 plays a role in mitosis progression, this function is not  
349 absolutely necessary for B cells to proliferate as both normal and lymphoma B cells  
350 have been shown to be able to undergo cell division in the presence of GSK3  
351 inhibitors or in the absence of the GSK3 $\alpha$ / $\beta$  proteins(Jellusova et al., 2017; Varano et  
352 al., 2017). In this study we propose that the outcome of  $\beta$ -catenin activity may be the  
353 determining factor of whether GSK3 inhibition results in accelerated proliferation or  
354 cell death. Despite the wide array of proteins being dysregulated after GSK3  
355 inhibition, we found that  $\beta$ -catenin accumulation alone is sufficient to replicate the  
356 phenotype of GSK3-inhibited cells. Similar to B cells treated with a GSK3 inhibitor,  
357 mature B cells with hyper-stabilized  $\beta$ -catenin show increased oxygen consumption,  
358 ROS production and proliferation. Equally, both GSK3-inhibited B cell precursors  
359 and B cell precursors with hyper-stabilized  $\beta$ -catenin display reduced production of  
360 ROS and increased cell death. Of note, we found cMyc protein levels and the  
361 phosphorylation of ribosomal protein S6 to be differentially regulated in mature B  
362 cells and B cell precursors upon GSK3 inhibition. GSK3 has been previously reported  
363 to negatively impact on both cMyc levels (Gregory et al., 2003) and mTORC1 activity  
364 (Inoki et al., 2006). In other cell types, GSK3 has been shown to phosphorylate and  
365 activate the TSC complex, which in turn inhibits mTORC1. However in B cells, this  
366 signaling pathway does not seem to play a dominant role in regulating S6  
367 phosphorylation, since both GSK3-deficient and GSK3-inhibited mature B cells show  
368 normal S6 phosphorylation(Jellusova et al., 2017). cMyc is targeted for degradation

369 via GSK3 induced phosphorylation(Gregory et al., 2003) and GSK3 deletion or  
370 inhibition has been shown to result in cMyc accumulation in various cell types,  
371 consistent with what we have observed in mature B cells. Surprisingly, we have  
372 found cMyc levels and S6 phosphorylation to be strongly decreased in GSK3-  
373 inhibited B cell precursors and malignant B cells. Since both cMyc and mTORC1  
374 signaling support mitochondrial biogenesis and function, reduced activity of these  
375 signaling pathways could explain the observed defects in mitochondrial activity.  
376 In summary our findings suggest that  $\beta$ -catenin plays a dominant role in  
377 determining B cell fate and that unlike in many other cell types  $\beta$ -catenin  
378 accumulation in B cell precursors dampens metabolic activity and proliferation.  
379  $\beta$ -Catenin is a transcriptional co-activator and we could show that both GSK3  
380 inhibition or  $\beta$ -catenin accumulation not only alter the metabolic program of B cell  
381 precursors, but also dramatically reshape their gene expression profile. Particularly,  
382 GSK3 inhibition/ $\beta$ -catenin accumulation resulted in reduced Pax5, Foxo1 and  
383 increased Blimp1 expression. Moreover we show that B cell precursors which  
384 already demonstrate commitment to the B cell lineage by expressing B220 and  
385 CD19 still downregulate Pax5 upon GSK3 inhibition. Blimp1 is a transcription factor  
386 that is known to induce B cell differentiation to plasma cells and has recently been  
387 demonstrated to negatively impact the survival of B cell precursors(Hug et al., 2014;  
388 Setz et al., 2018). Thus, increased Blimp1 expression could contribute to reduced  
389 survival of B cell precursors after GSK3 inhibition/ $\beta$ -catenin stabilization. However,  
390 since Blimp1 deletion failed to rescue survival of B cell precursors after GSK3  
391 inhibition, other signaling events likely contribute to the observed phenotype. In  
392 addition to reduced Pax5 levels, we have observed the protein levels of the  
393 transcription factor Foxo1 to be reduced upon GSK3 inhibition. Consistent with the  
394 essential role of Foxo1 in B cell development and B-ALL survival (Alkhatib et al.,  
395 2012; Dengler et al., 2008; Wang et al., 2018) the observed reduction of Foxo1  
396 protein levels could contribute to impaired survival after GSK3 inhibition.  
397 As a transcriptional activator,  $\beta$ -catenin can pair with different factors including the  
398 transcription factors from the TCF/LEF family or Hif1 $\alpha$ (Kaidi et al., 2007; Valenta et  
399 al., 2012). It is possible that  $\beta$ -catenin interacts with different transcription factors

400 depending on the maturation stage of B cells. Identification of the main  $\beta$ -catenin  
401 interaction partners in mature B cells and B cell precursors could thus help to  
402 understand the different behavior of these two subsets. Alternatively,  $\beta$ -catenin  
403 accumulation could initially drive a hyper-metabolic phenotype supporting  
404 proliferation in mature B cells, but quickly deplete cellular energy stores leading to a  
405 metabolic collapse in B cell precursors. B cell precursors have been suggested to be  
406 particularly sensitive to energetic stress (Müschen, 2019). A model has been  
407 proposed in which aberrantly increased metabolic activity is interpreted as a sign of  
408 malignant transformation or the expression of an autoreactive BCR and therefore  
409 stringent mechanisms must exist to eliminate B cell precursors with high energetic  
410 demands(Müschen, 2019). Consistent with this model metabolic stress caused by  $\beta$ -  
411 catenin accumulation may signal oncogene activation in pre B cells and thus lead to  
412 cell death. In summary, our study provides new insight into GSK3 driven B cell  
413 signaling and provides a rationale to focus on  $\beta$ -catenin induced transcriptional  
414 changes in order to fully harness the potential of GSK3 inhibitors for the treatment  
415 of B cell derived malignancies.

416

417

## 418 **Material and methods**

419

### 420 **Mice**

421 Mice bearing the *Catnb lox(ex3)* locus have been described previously(Harada et al.,  
422 1999). *Catnb lox(ex3)* mice were crossed to *mb1-cre<sup>ERT2</sup>* mice (Hobeika et al., 2015;  
423 Hug et al., 2014). Mice were i.p. injected with 1mg tamoxifen (Sigma) + 10% ethanol  
424 (Roth) in olive oil on three consecutive days. Control animals were injected with  
425 tamoxifen the same way as experimental animals. To induce deletion of *catnb* exon  
426 3 in B cell precursors *Catnb lox(ex3)* mice were crossed to *Mb1-cre* mice. For both  
427 lines, mice homozygous or heterozygous for the *Catnb lox(ex3)* locus were used as  
428 experimental animals. Since no significant differences were observed between  
429 homozygous and heterozygous mice, the exact genotype is not indicated when  
430 presenting data. As controls, both Cre-positive and negative animals were used. No

431 significant differences were observed between these two types of control animals.  
432 Both male and female mice were used for experiments. Animals were maintained in  
433 a specific pathogen free environment. Experiments were approved by the regional  
434 council in Freiburg, Germany and carried out in accordance with the German Animal  
435 Welfare Act. For experiments with Blimp1-deficient B cell precursors, bone marrow  
436 was obtained from *Mb1-cre x Prdm1<sup>lox</sup>* mice (Setz et al., 2018).

437

### 438 **B cell purification and cell culture**

439

440 To obtain mature B cells, spleens were homogenized and red blood cells were lysed  
441 using an ammonium-chloride-potassium solution (150mM NH<sub>4</sub>Cl, 1mM KHCO<sub>3</sub>,  
442 0.1mM Na<sub>2</sub>EDTA). B cells were purified using CD43 magnetic beads (Miltenyi) or the  
443 EasySep mouse B cell isolation kit (StemCell) following manufacturers instructions.  
444 Cells were cultured in RPMI (Gibco) + 10% FBS (Biochrome AG LOT 0340A) +  
445 100Units/ml Penicillin + 100µg/ml Streptomycin (Gibco) + 1 mM sodium pyruvate  
446 (Thermo Fisher Scientific) + 2 mM Glutamax + 1x non-essential amino acids (Gibco)  
447 + 57µM β-Mercaptoethanol (Sigma) at 37°C in an atmosphere with 5% CO<sub>2</sub>. The  
448 following reagents were used in individual experiments: 5µg/ml anti-CD40  
449 (SantaCruz or BioLegend ), 10ng/ml IL-4 (Sigma), 40nM LY2090314 (Sigma).

450

451 Two different protocols were used to obtain B cell precursors. In the first  
452 experimental setup bones were flushed with 10%FBS (PAN, Lot: P140508) PBS, red  
453 blood cells were lysed and cells were cultured in Iscove's medium (Merck,  
454 Biochrom)+10% FBS (PAN Premium Lot: P140508) + 100Units/ml Penicillin +  
455 100µg/ml Streptomycin (Gibco)+2mM Glutamax + 57µM β-Mercaptoethanol  
456 (Sigma) + 0.4ng/ml IL-7 (Sigma)+40µl/ml IL-7 (obtained from IL-7 producing J558L  
457 cells) at 37°C in an atmosphere with 7.5% CO<sub>2</sub>. Cells were repeatedly re-plated on  
458 new cell culture dishes to remove adherent cells. Experiments were performed  
459 once the culture reached a purity of 90-95% CD19+B cells. Cells were kept in culture  
460 for up to 8 weeks. This protocol was used to generate B cell precursors used in  
461 experiments presented in figures: 2F, 2H and 3B. In the second experimental setup,

462 lineage negative cells were obtained from bone marrow using anti-Gr1, CD11b,  
463 CD3e, CD49b, Ter119 and B220 antibodies coupled to biotin (eBioscience) and anti-  
464 biotin magnetic beads (Miltenyi). Lineage-depleted cells were cultured in 10ng/ml  
465 IL-7 (Sigma), 50ng/ml Flt3-L (Sigma) and 50ng/ml SCF (Sigma) in Opti-MEM  
466 medium (Gibco) with: 20%FBS premium (PAN, Lot: P140508)+ 1 mM sodium  
467 pyruvate (Thermo Fisher Scientific)+ 2 mM Glutamax +25mM HEPES +  
468 100Units/ml Penicillin + 100µg/ml Streptomycin (Gibco)+ 57µM β-  
469 Mercaptoethanol (Sigma) at 37°C in an atmosphere with 7.5% CO<sub>2</sub>.  
470 Flt3-L was withdrawn after 3 days and SCF was withdrawn after 6-8 days. The cells  
471 were cultured in IL-7 alone or IL7+SCF for at least 2 days before experiments were  
472 performed. B cell precursors obtained through this protocol were used in  
473 experiments shown in figures: 5 and 6. In experiments where GSK3 was inhibited,  
474 cells were plated in a concentration of 10<sup>6</sup>/500µl and were treated with 40nM  
475 LY2090314 (Sigma). To transform B cell precursors, the cells were transformed  
476 retrovirally with *BCR-ABL1* (Pear et al., 1998). IL-7 was removed from the culture  
477 to eliminate non-transduced cells. Transformed B cell precursors were maintained  
478 in Iscove's medium (Merck, Biochrom)+10% FBS premium (PAN Lot: P140508)+  
479 100Units/ml Penicillin + 100µg/ml Streptomycin (Gibco)+2mM Glutamax (with  
480 Iscove's medium without stable Glutamine)+ 57µM β-Mercaptoethanol (Sigma) at  
481 37°C in an atmosphere with 7.5% CO<sub>2</sub>. To inhibit GSK3, cells were plated in a  
482 concentration of 10<sup>6</sup>/ml with or without 40nM LY2090314 (Sigma).  
483 All lymphoma cell lines were maintained in RPMI + 10% FBS + 100Units/ml  
484 Penicillin + 100µg/ml Streptomycin (Gibco) + 57µM β-Mercaptoethanol at 37°C in a  
485 5% CO<sub>2</sub> atmosphere. To inhibit GSK3, cells were plated in a concentration of 0.5  
486 10<sup>6</sup>/1ml with or without 40nM LY2090314 (Sigma).

487

#### 488 **Flow cytometry**

489 Single cell suspensions were stained with fluorescently labeled antibodies in FACS  
490 buffer (PBS+ 1% BSA+ 0.09% NaN<sub>3</sub>). The following antibodies were used for flow  
491 cytometry: B220(RA3-6B2, Biolegend or ThermoFisher), BP1(6C3, eBioscience),  
492 CD19(eBio1D3, ThermoFisher), CD21/CD35 (4E3, ThermoFisher), CD23(B3B4,



493 eBioscience) and IgM (II/41, eB121-15F9, eBioscience). To distinguish between life  
494 and dead cells 7AAD (Sigma) or LIVE/DEAD fixable yellow death stain kit  
495 (Molecular Probes) were used. For intracellular staining cells were fixed and  
496 permeabilized with 2% paraformaldehyde and 70% methanol or with BD Cytotfix/  
497 Cytoperm buffer (BD Biosciences) and permeabilization buffer (eBioscience) and  
498 incubated with 5µl β-catenin in 100µl Perm buffer (BD), 0.5µl cleaved caspase 3  
499 (Cell Signaling Technology) or anti-Foxo1 (Cell Signaling Technology) in 100µl Perm  
500 buffer (BD) for 1h hour on ice. Cells were washed twice with Perm buffer (BD) and  
501 incubated with an anti-rabbit secondary antibody (Biolegend) if needed. For Blimp1  
502 and PAX5 intracellular staining, cells were fixed and permeabilized with 3.1%  
503 paraformaldehyde and 0.05% Triton in PBS with 1µl anti-Blimp1 (Biolegend) or 1µl  
504 anti-Pax5 (Biolegend) in 100µl Perm/wash buffer (BD) for 1h hour at RT. For cell  
505 cycle analysis, 10µM BrdU (eBioscience) was added to the cell culture for 24h. Cells  
506 were fixed and permeabilized using the BD Cytotfix/Cytoperm buffer system (BD)  
507 and permeabilization buffer (eBioscience), incubated with 0.3mg/ml DNase  
508 (eBioscience) for 1h at 37°C, washed with Perm buffer (BD) and treated with anti-  
509 BrDU (eBioscience) in Perm buffer for 30min at room temperature. Cells were  
510 washed, 0.5µg/ml DAPI or 7AAD was added to detect DNA, and live cells were  
511 identified gating on forward side scatter. Cell cycle analysis was performed on day  
512 5-6 of cell culture, cells were SCF+IL7 dependent at this point.  
513 Cells were analyzed by flow cytometry. The following cytometers were used for  
514 acquisition of flow cytometry data: LSR II (BD), CyAn (Beckman Coulter), Attune  
515 (Thermo Fisher Scientific). FlowJo software (TreeStar) was used for analysis.

516

### 517 **Analysis of metabolic parameters and proliferation**

518 Oxygen consumption was assessed using a Seahorse XFe96 metabolite analyzer  
519 (Agilent). 10<sup>5</sup> Ramos cells, 1x10<sup>5</sup> transformed or 3x10<sup>5</sup> normal B cell precursors or  
520 10<sup>6</sup> mature stimulated B cells were plated on Cell-Tak (Corning) coated Seahorse  
521 cell culture plates. The cells were first incubated in Seahorse base medium + 1mM  
522 sodium pyruvate (Thermo Fisher Scientific) + 2mM L-glutamine (Thermo Fisher  
523 Scientific) + 10mM glucose (Sigma) in a volume of 50µl for 30min, 130µl medium

524 were added in a second step and the cells were incubated for an additional 1h.  
525 Oligomycin, FCCP and rotenone+antimycin were sequentially injected during the  
526 measurement to a final concentration of 1 $\mu$ M each to assess different parameters of  
527 respiration. To measure the production of reactive oxygen species, cells were  
528 stained with 10 $\mu$ M carboxy-H2DCFDA (Thermo Fisher Scientific) for 20min at 37°C  
529 and washed before measurement. To assess glucose uptake cells were incubated  
530 with 30 $\mu$ M 2NBDG (Cayman Chemical) in PBS (Invitrogen) for 30min at 37°C and  
531 analyzed by flow cytometry. To analyze proliferation, cells were loaded with 5 $\mu$ M  
532 proliferation dye eFluor670 (eBioscience) and cultured for up to 3 days. Dilution of  
533 the proliferation dye was measured by flow cytometry.

534

#### 535 **Immunoblot analysis**

536 Cells were lysed in RIPA buffer (150 mM NaCl, 1% NP-40, 0.5% sodium  
537 deoxycholate, 0.1% sodium dodecyl sulfate, 50 mM Tris, 1 mM EDTA) supplemented  
538 with proteinase and phosphatase activity inhibitors sodium orthovanadate (1mM),  
539 sodium fluoride (10mM) and proteinase inhibitor cocktail containing AEBSF,  
540 aprotinin, bestatin hydrochloride, E-64, EDTA, leupeptin (Sigma). Immunoblotting  
541 was performed following standard procedures. PVDF membranes (Merck Milipore)  
542 were blocked with 5% milk powder in TBS buffer (150 mM NaCl, 50 mM Trizma, pH  
543 7.6)+ 0.1% Tween20. All primary antibodies were purchased from Cell Signaling  
544 Technology and used at a 1:1000 dilution. The following antibodies were used: Actin  
545 (13E5),  $\beta$ -catenin (D10A8), cMyc (D84C12), pS6<sup>Ser(235/236)</sup> (D57.2.2E), Blimp1  
546 (C14A4), Foxo1 (C29H4). A horseradish-peroxidase-coupled goat anti-rabbit IgG  
547 (Jackson or Cell Signaling Technology) was used as a secondary antibody.

548

#### 549 **Transcriptome analysis**

550 B cell precursors were obtained from hematopoietic stem cell cultures of control or  
551 *Mb1<sup>crex</sup> Catnb lox(ex3)* mice as described above and sorted based on B220  
552 expression by flow cytometry, after sorting cells were directly processed for RNA  
553 isolation. For experiments in which GSK3 was inhibited, B cell precursors were  
554 treated with LY2090314 over night and directly processed for RNA isolation

555 without prior sorting. RNA was extracted using Quick-RNA MicroPrep (ZYMO  
556 RESEARCH) according to the manufacturer's instructions. The RNA concentration in  
557 RNase free H<sub>2</sub>O was analyzed by measuring the absorption at 260 / 280 nm with a  
558 NanoDrop (Thermo Scientific/Peqlab). Additionally, unsorted wildtype B cell  
559 precursors were incubated with or without 40nM LY2090314 (Sigma) over night  
560 and RNA was isolated. RNA was snap frozen in liquid nitrogen, samples were  
561 processed and the transcriptome was analyzed by Novogene company.

## 562 **Statistical analysis**

563 GraphPad Prism was employed for statistical analysis. To test for normal  
564 distribution the Shapiro-Wilk normality test was used. For independent normally  
565 distributed data the unpaired t test was used. For linked normally distributed data  
566 the paired t test was used. Otherwise the Mann Whitney U test was used. The  
567 specific test used to evaluate statistical significance is listed in the respective figure  
568 legend. Differences were considered statistically significant if \* $p < 0.05$ . Number of  
569 independent repeats and technical replicates are indicated in the figure legend. In all  
570 graphs showing statistical analysis the mean is indicated by a small horizontal line.  
571 Statistical analysis of transcription data was performed by Novogene company.  
572 Geneontology enrichment analysis was performed using PANTHER on the  
573 geneontology.org website (Ashburner et al., 2000; Carbon et al., 2019; Mi et al.,  
574 2019), principal component analysis was performed and visualized in a  
575 multidimensional scaling plot using R statistical software (Chen et al., 2016; R-core-  
576 team, 2020). Mice were allocated to groups based on their genotype. Numbers  
577 rather than the genotype were used to label samples, however the researchers were  
578 not entirely blinded to group allocation. Sample sizes were determined based on  
579 previous experience. For experiments shown in figure 4I and 4J a power analysis  
580 was performed using the following parameters: effective size=1.7, power=0.8,  
581 sig.level=0.05. The effective size was determined based on previous experiments in  
582 which large differences were expected to be observed. Using these parameters the n  
583 was determined to be 6.54 for each group.

584

585

586 **Data availability**

587 Raw data obtained from transcriptome analysis were deposited with GEO and will  
588 be made publicly accessible upon manuscript acceptance. Original, uncropped  
589 pictures of shown western blots are included in source data. Additional repeats of  
590 the experiments are also included in the source data. Numerical data used for all the  
591 shown graphs are included in the source data.

592

593 **Conflict of interest**

594 The authors declare no conflict of interest.

595

596

597 **Acknowledgements**

598 We would like to thank John Apgar, Sanford Burnham Prebys Medical Discovery  
599 Institute, La Jolla, USA for providing us with the lymphoma cell lines: Jeko, Mino,  
600 OCI-LY1, OCI-LY7 and OCI-LY19. We would like to thank Michael Reth for providing  
601 us with the *mb1-cre<sup>ERT2</sup>* and the *Mb1-Cre* mice. We would like to acknowledge the  
602 Signalling Factory of the Research Centres BIOSS and CIBSS for providing support with  
603 flow cytometry.

604

605 **Funding**

606 J.J. was supported by the Ministry of Science, Research and the Arts Baden-  
607 Wuerttemberg and the European Social Fund through a Margarete von Wrangell  
608 fellowship. This study was supported by the German Research Foundation (DFG)  
609 through the TRR130 (TP-25 to J.J.) and the research grant project number:  
610 419193696 (to J.J.). The Signalling Factory is supported by the German Research  
611 Foundation (DFG) under Germany's Excellence Strategy (BIOSS-EXC 294 and CIBSS-  
612 EXC-2189- Project ID 390939984).

613

614 **Author contribution**

615 Hu.J performed the majority of the experiments and analyzed the data and  
616 contributed to writing the manuscript. K.M.K performed part of the experiments.  
617 C.S. and Ha.J. provided bone marrow from *Mb1-cre x Prdm1<sup>lox</sup>* mice. Additionally,  
618 Ha.J. contributed to editing the manuscript and provided ideas for experiments.  
619 M.M.T provided the *Catnb lox(ex3)* mice. J.J conceived of and coordinated the study,  
620 performed part of the experiments, interpreted the results and wrote the  
621 manuscript.  
622  
623

624 **Figures**

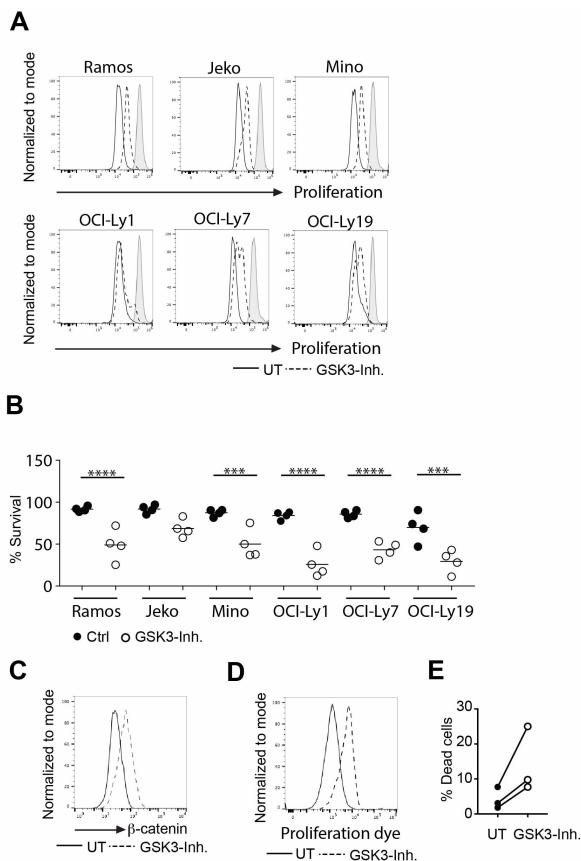

625

626 **Figure 1: GSK3 inhibition reduces proliferation and survival of malignant B**  
 627 **cells** A+B) The indicated lymphoma cell lines were treated with LY2090314 for two  
 628 days and the dilution of the dye eFluor670 as a measure of proliferation was  
 629 analyzed by flow cytometry (A). Shown is one out of 3-4 independent experiments.  
 630 The percentage of viable cells was determined using forward and side scatter. The  
 631 summary of the performed experiments is shown in B). Significance was determined  
 632 using the ANOVA test \*\*\*\* $p < 0.0001$ , \*\*\* $p = 0.0002$  and  $0.0006$  C) BCR-Abl  
 633 transformed B cell precursors were treated with LY2090314 over night.  $\beta$ -catenin

634 expression was analyzed by flow cytometry. One of 3 independent experiments with  
635 5 mice in total is shown. D) BCR-Abl transformed B cell precursors were treated  
636 with LY2090314 for 3 days and the dilution of the dye eFluor670 as a measure of  
637 proliferation was analyzed by flow cytometry. One of 5 independent experiments is  
638 shown. E) Cells were treated with LY2090314 for 3 days. Cell survival was  
639 determined by Live/Dead Fixable yellow cell stain incorporation. Circles represent  
640 independent experiments. UT= untreated cells GSK3-inh= cells treated with  
641 LY2090314  
642  
643

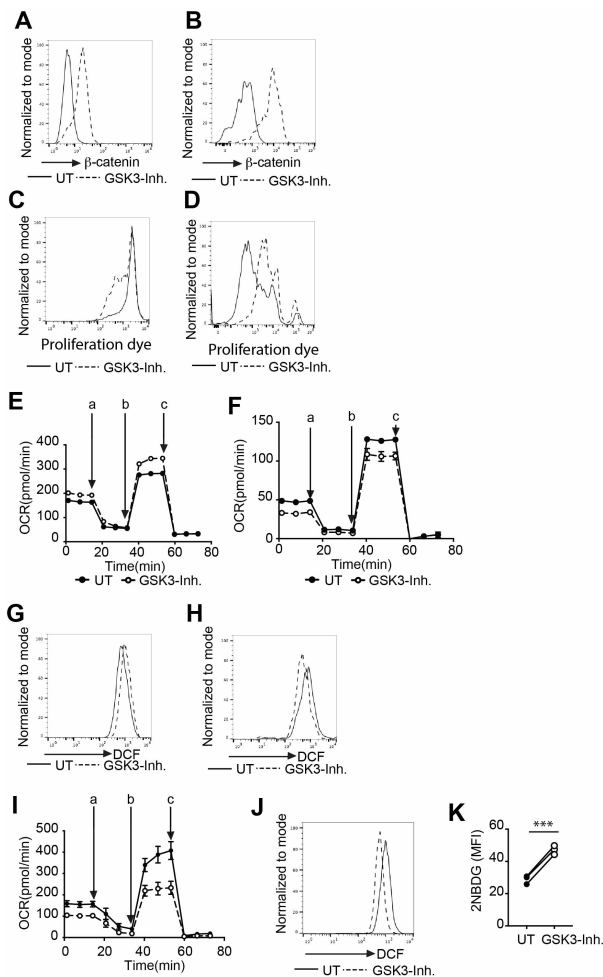

644

645 **Figure 2.: GSK3 plays a context dependent role in B cells**

646 A) Mature B cells were stimulated over night with anti-CD40+IL-4 in the presence or  
 647 absence of LY2090314,  $\beta$ -catenin accumulation was determined by flow cytometry.

648 One of 6 representative experiments is shown. B) B cell precursors were cultured  
 649 with IL-7 in the presence or absence of LY2090314 for 1-3 days,  $\beta$ -catenin  
 650 accumulation was determined by flow cytometry. One of 6 representative  
 651 experiments is shown. C) Mature B cells were stimulated with anti-CD40+IL-4 in the



652 presence or absence of LY2090314 for 3 days, dilution of the dye eFluor670 as a  
653 measure of proliferation was assessed by flow cytometry. One of 6 independent  
654 experiments is shown. D) B cell precursors were cultured with IL-7 in the presence  
655 or absence of LY2090314 for 3 days, dilution of the dye eFluor670 as a measure of  
656 proliferation was assessed by flow cytometry. One of 4 independent experiments is  
657 shown. E) Mature B cells were stimulated with anti-CD40+IL-4 in the presence or  
658 absence of LY2090314 for 1 day, oxygen consumption was measured. One of 3  
659 independent experiments is shown. F) B cell precursors were cultured with IL-7 in  
660 the presence or absence of LY2090314 for 1 day, oxygen consumption was  
661 measured. One of three experiments is shown. G) Mature B cells were stimulated  
662 with anti-CD40+IL-4 in the presence or absence of LY2090314 for 1-2 days, ROS  
663 production was measured by flow cytometry. One of 4 independent experiments is  
664 shown. H) B cell precursors were cultured with IL-7 in the presence or absence of  
665 LY2090314 for 1-2 days, ROS production was measured by flow cytometry. One of 3  
666 independent experiments is shown. I) BCR-Abl transformed B cell precursors were  
667 treated overnight with LY2090314 and oxygen consumption was measured. J) BCR-  
668 Abl transformed B cell precursors were treated overnight with LY2090314. ROS  
669 production was measured by flow cytometry. One of 3 independent experiments is  
670 shown. K) BCR-Abl transformed B cell precursors were treated with LY2090314.  
671 Glucose uptake was determined by flow cytometry. Circles represent independent  
672 experiments. Significance was determined using the paired t test  $N=3$   $p^*=0.0008$ . In  
673 experiments in which technical replicates were used circles represent the mean  
674 value of these replicates (E, F, I). OCR= oxygen consumption rate, MFI = geometric  
675 mean fluorescence intensity, UT= untreated cells GSK3-inh= cells treated with  
676 LY2090314, a= oligomycin, b=FCCP, r+a= rotenone + antimycin.  
677

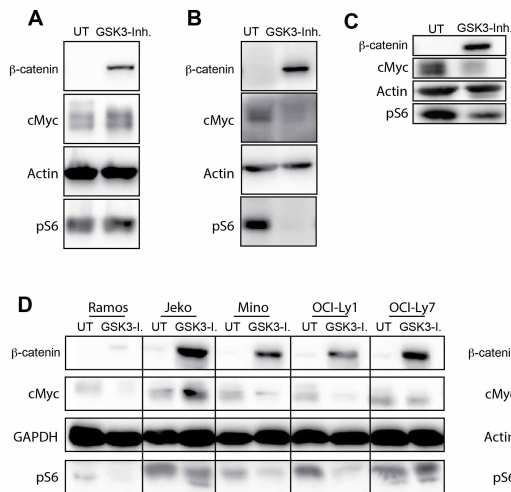

678

679

680 **Figure 3.: β -catenin but not cMyc accumulates after GSK3 inhibition in**  
 681 **malignant B cells**

682 The expression of the indicated proteins was determined by western blot. A) Mature  
 683 B cells were stimulated with anti-CD40+IL-4 in the presence or absence of  
 684 LY2090314 for 1 day. One of 3 independent experiments is shown. B) B cell  
 685 precursors were cultured over night in IL-7 in the presence or absence of  
 686 LY2090314. One of 5 independent experiments is shown. C) BCR-Abl transformed B  
 687 cell precursors were treated with LY2090314 over night. One of 2 independent  
 688 experiments with three mice in total is shown. D) The indicated lymphoma cell lines  
 689 were treated with LY2090314 over night. One out of three independent experiments  
 690 is shown. UT= untreated cells GSK3-I= cells treated with LY2090314

691

692

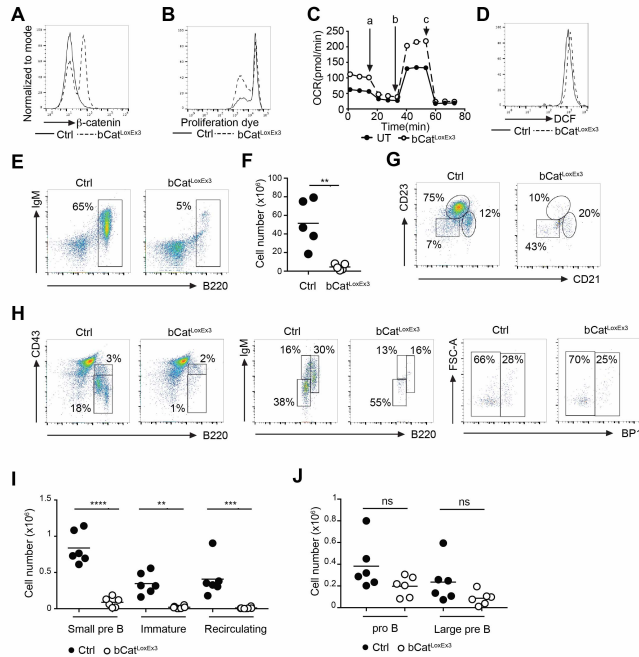

693

694 **Figure 4.: Accumulation of  $\beta$ -catenin interferes with B cell development**

695

696 A) *Mb1-cre<sup>ERT2</sup> x Catnb lox(ex3)* mice were injected 3 times with tamoxifen.

697 Accumulation of  $\beta$ -catenin was determined by flow cytometry. One of at least 6

698 experiments is shown. B) To induce cre activation *Mb1-cre<sup>ERT2</sup> x Catnb lox(ex3)* mice

699 were injected 3 times with tamoxifen or purified B cells were cultured with hydroxy

700 tamoxifen. Mature B cells were cultured with anti-CD40+IL-4 for 3 days. Dilution of

701 the dye eFluor670 as a measure of proliferation was assessed by flow cytometry.

702 One of 6 independent experiments is shown. C) Purified B cells were treated with

703 hydroxytamoxifen and stimulated with anti-CD40+IL-4 for 2 days. Oxygen

704 consumption was measured. One of 3 independent experiments is shown.

705 a=oligomycin, b=FCCP, c= rotenone+antimycin D) *Mb1-cre<sup>ERT2</sup> x Catnb lox(ex3)* mice  
706 were injected 3 times with tamoxifen. Mature B cells were purified and cultured  
707 overnight with anti-CD40+IL-4. ROS production was measured by flow cytometry.  
708 One of 3 independent experiments is shown. E+F+G) B cell maturation in spleens  
709 from *Mb1-cre x Catnb lox(ex3)* mice was analysed by flow cytometry. The frequency  
710 of B220<sup>+</sup> cells was determined. A representative plot is shown in E) total numbers of  
711 B220<sup>+</sup> cells from 5 independent experiments are shown in F). Statistical significance  
712 was determined using the unpaired t test, n=5, p\*\* =0.0036 A representative plot  
713 showing the frequency of mature B cells (B220<sup>+</sup>, CD21<sup>med</sup>, CD23<sup>+</sup>), marginal zone +  
714 transitional type 2 B cells (B220<sup>+</sup>, CD21<sup>+</sup>, CD23<sup>low</sup>) and transitional type 1 B cells +  
715 B1a cells (B220<sup>+</sup>, CD21<sup>-</sup>, CD23<sup>-</sup>) is shown in G). One of 5 independent experiments is  
716 shown. H+I+J) B cell development in the bone marrow of *Mb1-cre x Catnb lox(ex3)*  
717 mice was determined by flow cytometry. Representative plots are shown in H), total  
718 cell numbers of mature recirculating B cells (CD43<sup>-</sup>, B220<sup>high</sup>, IgM<sup>+</sup>), small pre B cells  
719 (CD43<sup>-</sup>, B220<sup>low</sup>, IgM<sup>-</sup>), immature B cells (CD43<sup>-</sup>, B220<sup>low</sup>, IgM<sup>+</sup>), pro B cells (CD43<sup>+</sup>,  
720 B220<sup>low</sup>, IgM<sup>-</sup>, BP1<sup>-</sup>) and large pre B cells (CD43<sup>+</sup>, B220<sup>low</sup>, IgM<sup>-</sup>, BP1<sup>+</sup>) obtained from  
721 6 independent experiments are shown in I and J. Statistical significance was  
722 determined using the one way ANOVA, n=6, p\*\*\*\*<0.0001, p\*\*\*=0.0002, p\*\*=0.0026  
723 Circles represent independent experiments. Ctrl= control mice, bCatloxEx3 = Cre  
724 positive mice carrying the *Catnb lox(ex3)* locus.  
725

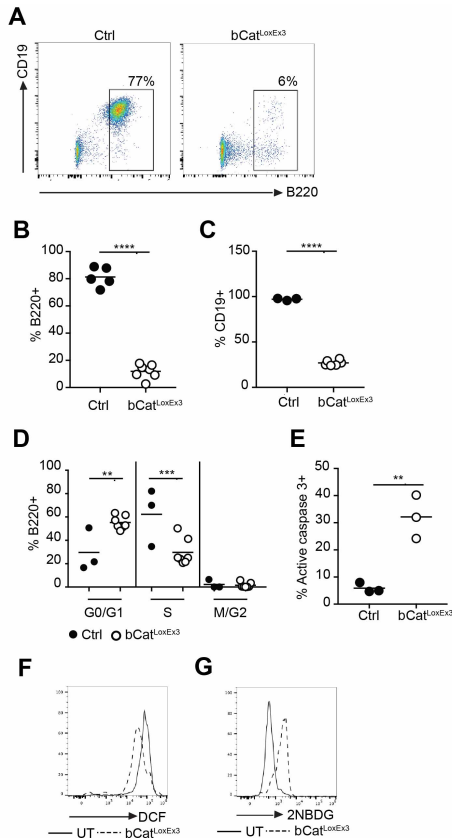

726

727

728 **Figure 5.: Accumulation of  $\beta$ -catenin induces cell death in B cell precursors**

729

730 A+B+C) B cell development was analyzed in vitro using *Mb1-cre x Catnb lox(ex3)*  
 731 bone marrow hematopoietic stem cells. The frequency of B220+ cells 7-11 days  
 732 after the removal of Flt3L+SCF and in the presence of IL-7 was determined by flow  
 733 cytometry. A representative plot is shown in A). A summary of 5 independent  
 734 experiments with 5 control mice and 7 experimental mice in total is shown in B).  
 735 Statistical significance was determined using the unpaired test. N=5 and 7,  
 736 p\*\*\*\*<0.0001 The frequency of CD19+ cells within the pool of B220+ cells is shown

737 in C). Statistical significance was determined using the unpaired test. N=3 and 6,  
738  $p^{****}<0.0001$  D) Cell cycle distribution in B cell precursors (B220+, CD19+) obtained  
739 from *Mb1-cre x Catnb lox(ex3)* bone marrow hematopoietic stem cells cultured in the  
740 presence of IL-7 +SCF at day 5-6 of culture was determined by BrdU and 7aad or  
741 DAPI incorporation. Statistical significance was determined using the ANOVA test,  
742 n=3 and 5,  $p^{**}=0.0077$ ,  $p^{***}=0.0008$  E) Apoptosis of B cell precursors (B220+,  
743 CD19+) obtained from *Mb1-cre x Catnb lox(ex3)* bone marrow hematopoietic stem  
744 cells cultured in the presence of IL-7 1-5 days after Flt3L+SCF removal was  
745 determined by staining for active caspase 3. Statistical significance was determined  
746 using the unpaired test, n=3,  $p^{**}=0.0052$  F) ROS production in B cell precursors  
747 (B220+, CD19+) obtained from *Mb1-cre x Catnb lox(ex3)* bone marrow  
748 hematopoietic stem cells cultured in the presence of IL-7 2-8 days after Flt3L+SCF  
749 removal was determined using flow cytometry. One of 3 independent experiments is  
750 shown. G) Glucose uptake in B cell precursors (B220+, CD19+) obtained from *Mb1-*  
751 *cre x Catnb lox(ex3)* bone marrow hematopoietic stem cells cultured in the presence  
752 of IL-7 2 days after Flt3L+SCF removal was determined using flow cytometry. One of  
753 4 independent experiments is shown. Circles represent individual mice. Ctrl=  
754 control mice, bCatloxEx3 = Cre positive mice carrying the *Catnb lox(ex3)* locus.  
755

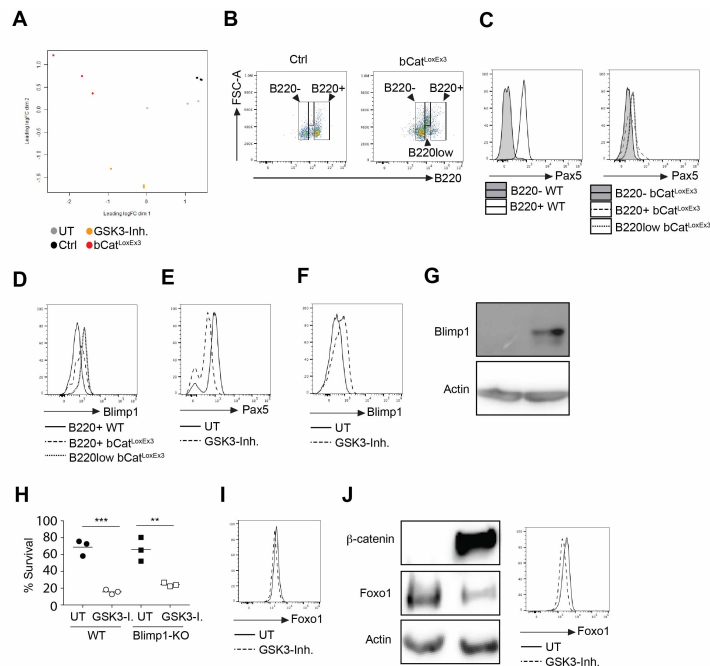

756

757 **Figure 6.: Accumulation of  $\beta$ -catenin disrupts the B cell gene expression**  
 758 **profile in B cell precursors**

759 A) PCA analysis of the transcriptome of *Mb1-cre x Catnb lox(ex3)* and control B cell  
 760 precursors and B cell precursors incubated with and without LY2090314 over night.  
 761 Circles represent samples obtained from different mice. B) Flow cytometric analysis  
 762 of permeabilized *Mb1-cre x Catnb lox(ex3)* and control B cell precursors on day 11 of  
 763 culture. C+D) Pax5 (C) and Blimp1 (D) expression in B220-, B220+ and B220low  
 764 cells. Gating strategy shown in B). One out of 3 experiments is shown. E+F) Pax5 (E)  
 765 and Blimp1 (F) expression in B cell precursors treated with LY2090314. One out of  
 766 5 experiments is shown. G) Blimp1 expression in transformed B cell precursors  
 767 treated with LY2090314. One out of two independent experiments is shown. H)  
 768 Control and Blimp1-deficient B cells were treated with LY2090314, survival was  
 769 determined on day 3 via flow cytometry. The ANOVA test was used for statistical  
 770 analysis \*\* $p=0.0016$  , \*\*\* $p=0.0003$  I) Foxo1 expression in normal B cell precursors

771 treated with LY2090314 as determined by flow cytometry. One of two independent  
772 experiments is shown. J) Foxo1 expression in transformed B cell precursors treated  
773 with LY2090314 as determined by flow cytometry (left) and westernblot (right).  
774 One out of two independent experiments is shown. Circles represent individual  
775 mice. Ctrl= control mice, bCatloxEx3 = Cre positive mice carrying the *Catnb lox(ex3)*  
776 locus, GSK3-Inh= samples treated with LY2090314, UT= wildtype untreated cells.

777

## 778 **References**

779 Alkhatib A, Werner M, Hug E, Herzog S, Eschbach C, Faraidun H, Köhler F, Wossning  
780 T, Jumaa H. 2012. FoxO1 induces Ikaros splicing to promote immunoglobulin  
781 gene recombination. *J Exp Med* **209**:395–406. doi:10.1084/jem.20110216  
782 Ashburner M, Ball CA, Blake JA, Botstein D, Butler H, Cherry JM, Davis AP, Dolinski K,  
783 Dwight SS, Eppig JT, Harris MA, Hill DP, Issel-Tarver L, Kasarskis A, Lewis S,  
784 Matese JC, Richardson JE, Ringwald M, Rubin GM, Sherlock G. 2000. Gene  
785 Ontology: tool for the unification of biology. *Nat Genet* **25**:25–29.  
786 doi:10.1038/75556  
787 Baracho G V., Cato MH, Zhu Z, Jaren OR, Hobeika E, Reth M, Rickert RC. 2014. PDK1  
788 regulates B cell differentiation and homeostasis. *Proc Natl Acad Sci U S A*  
789 **111**:9573–9578. doi:10.1073/pnas.1314562111  
790 Carbon S, Douglass E, Dunn N, Good B, Harris NL, Lewis SE, Mungall CJ, Basu S,  
791 Chisholm RL, Dodson RJ, Hartline E, Fey P, Thomas PD, Albou LP, Ebert D,  
792 Kesling MJ, Mi H, Muruganujan A, Huang X, Poudel S, Mushayahama T, Hu JC,  
793 LaBonte SA, Siegele DA, Antonazzo G, Attrill H, Brown NH, Fexova S, Garapati P,  
794 Jones TEM, Marygold SJ, Millburn GH, Rey AJ, Trovisco V, Dos Santos G, Emmert  
795 DB, Falls K, Zhou P, Goodman JL, Strelets VB, Thurmond J, Courtot M, Osumi DS,  
796 Parkinson H, Roncaglia P, Acencio ML, Kuiper M, Lreid A, Logie C, Lovering RC,  
797 Huntley RP, Denny P, Campbell NH, Kramarz B, Acquaah V, Ahmad SH, Chen H,  
798 Rawson JH, Chibucos MC, Giglio M, Nadendla S, Tauber R, Duesbury MJ, Del NT,  
799 Meldal BHM, Perfetto L, Porras P, Orchard S, Shrivastava A, Xie Z, Chang HY,  
800 Finn RD, Mitchell AL, Rawlings ND, Richardson L, Sangrador-Vegas A, Blake JA,  
801 Christie KR, Dolan ME, Drabkin HJ, Hill DP, Ni L, Sitnikov D, Harris MA, Oliver



802 SG, Rutherford K, Wood V, Hayles J, Bahler J, Lock A, Bolton ER, De Pons J,  
803 Dwinell M, Hayman GT, Lauderkind SJF, Shimoyama M, Tutaj M, Wang SJ,  
804 D'Eustachio P, Matthews L, Balhoff JP, Aleksander SA, Binkley G, Dunn BL,  
805 Cherry JM, Engel SR, Gondwe F, Karra K, MacPherson KA, Miyasato SR, Nash RS,  
806 Ng PC, Sheppard TK, Shrivatsav Vp A, Simison M, Skrzypek MS, Weng S, Wong  
807 ED, Feuermann M, Gaudet P, Bakker E, Berardini TZ, Reiser L, Subramaniam S,  
808 Huala E, Arighi C, Auchincloss A, Axelsen K, Argoud GP, Bateman A, Bely B,  
809 Blatter MC, Boutet E, Breuza L, Bridge A, Britto R, Bye-A-Jee H, Casals-Casas C,  
810 Coudert E, Estreicher A, Famiglietti L, Garmiri P, Georghiou G, Gos A, Gruaz-  
811 Gumowski N, Hatton-Ellis E, Hinz U, Hulo C, Ignatchenko A, Jungo F, Keller G,  
812 Laiho K, Lemercier P, Lieberherr D, Lussi Y, Mac-Dougall A, Magrane M, Martin  
813 MJ, Masson P, Natale DA, Hyka NN, Pedruzzi I, Pichler K, Poux S, Rivoire C,  
814 Rodriguez-Lopez M, Sawford T, Speretta E, Shypitsyna A, Stutz A, Sundaram S,  
815 Tognolli M, Tyagi N, Warner K, Zaru R, Wu C, Chan J, Cho J, Gao S, Grove C,  
816 Harrison MC, Howe K, Lee R, Mendel J, Muller HM, Raciti D, Van Auken K,  
817 Berriman M, Stein L, Sternberg PW, Howe D, Toro S, Westerfield M. 2019. The  
818 Gene Ontology Resource: 20 years and still GOing strong. *Nucleic Acids Res*  
819 **47**:D330–D338. doi:10.1093/nar/gky1055

820 Chen Y, Lun ATL, Smyth GK. 2016. From reads to genes to pathways: differential  
821 expression analysis of RNA-Seq experiments using Rsubread and the edgeR  
822 quasi-likelihood pipeline. *F1000Research* **5**:1438.  
823 doi:10.12688/f1000research.8987.1

824 Cobaleda C, Schebesta A, Delogu A, Busslinger M. 2007. Pax5: The guardian of B cell  
825 identity and function. *Nat Immunol* **8**:463–470. doi:10.1038/ni1454

826 Dang C V. 2013. MYC, metabolism, cell growth, and tumorigenesis. *Cold Spring Harb*  
827 *Perspect Med* **3**. doi:10.1101/cshperspect.a014217

828 Dengler HS, Baracho G V, Omori SA, Bruckner S, Arden KC, Castrillon DH, DePinho  
829 RA, Rickert RC. 2008. Distinct functions for the transcription factor Foxo1 at  
830 various stages of B cell differentiation. *Nat Immunol* **9**:1388–98.  
831 doi:10.1038/ni.1667

832 Doble BW, Patel S, Wood GA, Kockeritz LK, Woodgett JR. 2007. Functional

833 Redundancy of GSK-3 $\alpha$  and GSK-3 $\beta$  in Wnt/ $\beta$ -Catenin Signaling Shown by Using  
834 an Allelic Series of Embryonic Stem Cell Lines. *Dev Cell* **12**:957–971.  
835 doi:10.1016/j.devcel.2007.04.001

836 El-Sahli S, Xie Y, Wang L, Liu S. 2019. Wnt signaling in cancer metabolism and  
837 immunity. *Cancers (Basel)* **11**:1–16. doi:10.3390/cancers11070904

838 El Fakih R, Jabbour E, Ravandi F, Hassanein M, Anjum F, Ahmed S, Kantarjian H.  
839 2018. Current paradigms in the management of Philadelphia chromosome  
840 positive acute lymphoblastic leukemia in adults. *Am J Hematol* **93**:286–295.  
841 doi:10.1002/ajh.24926

842 Gregory MA, Qi Y, Hann SR. 2003. Phosphorylation by Glycogen Synthase Kinase-3  
843 Controls c-Myc Proteolysis and Subnuclear Localization. *J Biol Chem*  
844 **278**:51606–51612. doi:10.1074/jbc.M310722200

845 Harada N, Tamai Y, Ishikawa TO, Sauer B, Takaku K, Oshima M, Taketo MM. 1999.  
846 Intestinal polyposis in mice with a dominant stable mutation of the  $\beta$ -catenin  
847 gene. *EMBO J* **18**:5931–5942. doi:10.1093/emboj/18.21.5931

848 Herzog S, Reth M, Jumaa H. 2009. Regulation of B-cell proliferation and  
849 differentiation by pre-B-cell receptor signalling. *Nat Rev Immunol* **9**:195–205.  
850 doi:10.1038/nri2491

851 Hobeika E, Levit-Zerdoun E, Anastasopoulou V, Pohlmeier R, Altmeier S, Alsadeq A,  
852 Dobenecker M, Pelanda R, Reth M. 2015. CD 19 and BAFF -R can signal to  
853 promote B -cell survival in the absence of Syk . *EMBO J* **34**:925–939.  
854 doi:10.15252/embj.201489732

855 Hobeika E, Thiemann S, Storch B, Jumaa H, Nielsen PJ, Pelanda R, Reth M. 2006.  
856 Testing gene function early in the B cell lineage in mb1-cre mice. *Proc Natl Acad*  
857 *Sci U S A* **103**:13789–13794. doi:10.1073/pnas.0605944103

858 Hug E, Hobeika E, Reth M, Jumaa H. 2014. Inducible expression of hyperactive Syk in  
859 B cells activates Blimp-1-dependent terminal differentiation. *Oncogene*  
860 **33**:3730–3741. doi:10.1038/onc.2013.326

861 Inoki K, Ouyang H, Zhu T, Lindvall C, Wang Y, Zhang X, Yang Q, Bennett C, Harada Y,  
862 Stankunas K, Wang C yu, He X, MacDougald OA, You M, Williams BO, Guan KL.  
863 2006. TSC2 Integrates Wnt and Energy Signals via a Coordinated

864 Phosphorylation by AMPK and GSK3 to Regulate Cell Growth. *Cell* **126**:955–  
865 968. doi:10.1016/j.cell.2006.06.055

866 Jellusova J, Cato MH, Apgar JR, Ramezani-Rad P, Leung CR, Chen C, Richardson AD,  
867 Conner EM, Benschop RJ, Woodgett JR, Rickert RC. 2017. Gsk3 is a metabolic  
868 checkpoint regulator in B cells. *Nat Immunol* **18**:303–312. doi:10.1038/ni.3664

869 Kaidi A, Williams AC, Paraskeva C. 2007. Interaction between  $\beta$ -catenin and HIF-1  
870 promotes cellular adaptation to hypoxia. *Nat Cell Biol* **9**:210–217.  
871 doi:10.1038/ncb1534

872 Küppers R. 2005. Mechanisms of B-cell lymphoma pathogenesis. *Nat Rev Cancer*  
873 **5**:251–262. doi:10.1038/nrc1589

874 Mancinelli R, Carpino G, Petrunaro S, Mammola CL, Tomaipitincá L, Filippini A,  
875 Facchiano A, Ziparo E, Giampietri C. 2017. Multifaceted roles of GSK-3 in cancer  
876 and autophagy-related diseases. *Oxid Med Cell Longev* **2017**.  
877 doi:10.1155/2017/4629495

878 Mi H, Muruganujan A, Ebert D, Huang X, Thomas PD. 2019. PANTHER version 14:  
879 More genomes, a new PANTHER GO-slim and improvements in enrichment  
880 analysis tools. *Nucleic Acids Res* **47**:D419–D426. doi:10.1093/nar/gky1038

881 Miller DM, Thomas SD, Islam A, Muench D, Sedoris K. 2012. c-Myc and cancer  
882 metabolism. *Clin Cancer Res* **18**:5546–5553. doi:10.1158/1078-0432.CCR-12-  
883 0977

884 Müschen M. 2019. Metabolic gatekeepers to safeguard against autoimmunity and  
885 oncogenic B cell transformation. *Nat Rev Immunol* **19**:337–348.  
886 doi:10.1038/s41577-019-0154-3

887 Pear WS, Miller JP, Xu L, Pui JC, Soffer B, Quackenbush RC, Pendergast AM, Bronson  
888 R, Aster JC, Scott ML, Baltimore D. 1998. Efficient and rapid induction of a  
889 chronic myelogenous leukemia-like myeloproliferative disease in mice  
890 receiving p210 bcr/abl-transduced bone marrow. *Blood* **92**:3780–3792.  
891 doi:10.1182/blood.v92.10.3780

892 R-core-team. 2020. R: A Language and Environment for Statistical Computing. *R*  
893 *Found Stat Comput* <https://www>.

894 Saxton RA, Sabatini DM. 2017. mTOR Signaling in Growth, Metabolism, and Disease.

895 *Cell* **168**:960–976. doi:10.1016/j.cell.2017.02.004

896 Setz CS, Hug E, Khadour A, Abdelrasoul H, Bilal M, Hobeika E, Jumaa H. 2018. PI3K-  
897 Mediated Blimp-1 Activation Controls B Cell Selection and Homeostasis. *Cell*  
898 *Rep* **24**:391–405. doi:10.1016/j.celrep.2018.06.035

899 Sherwood V. 2015. WNT Signaling: an Emerging Mediator of Cancer Cell  
900 Metabolism? *Mol Cell Biol* **35**:2–10. doi:10.1128/mcb.00992-14

901 Sutherland C. 2011. What are the bona fide GSK3 substrates? *Int J Alzheimers Dis*  
902 **2011**. doi:10.4061/2011/505607

903 Thornton TM, Delgado P, Chen L, Salas B, Kremontsov D, Fernandez M, Vernia S,  
904 Davis RJ, Heimann R, Teuscher C, Krangel MS, Ramiro AR, Rincón M. 2016.  
905 Inactivation of nuclear GSK3 $\beta$  by Ser389 phosphorylation promotes  
906 lymphocyte fitness during DNA double-strand break response. *Nat Commun* **7**.  
907 doi:10.1038/ncomms10553

908 Valenta T, Hausmann G, Basler K. 2012. The many faces and functions of  $\beta$ -catenin.  
909 *EMBO J* **31**:2714–2736. doi:10.1038/emboj.2012.150

910 Varano G, Raffel S, Sormani M, Zanardi F, Lonardi S, Zasada C, Perucho L, Petrocelli  
911 V, Haake A, Lee AK, Bugatti M, Paul U, Van Anken E, Pasqualucci L, Rabadan R,  
912 Siebert R, Kempa S, Ponzoni M, Facchetti F, Rajewsky K, Casola S. 2017. The B-  
913 cell receptor controls fitness of MYC-driven lymphoma cells via GSK3 $\beta$   
914 inhibition. *Nature* **546**:302–306. doi:10.1038/nature22353

915 Wang F, Demir S, Gehringer F, Osswald CD, Seyfried F, Enzenmüller S, Eckhoff SM,  
916 Maier T, Holzmann K, Debatin KM, Wirth T, Meyer LH, Ushmorov A. 2018. Tight  
917 regulation of FOXO1 is essential for maintenance of B-cell precursor acute  
918 lymphoblastic leukemia. *Blood* **131**:2929–2942. doi:10.1182/blood-2017-10-  
919 813576

920 Wu X, Stenson M, Abeykoon J, Nowakowski K, Zhang L, Lawson J, Wellik L, Li Y, Krull  
921 J, Wenzl K, Novak AJ, Ansell SM, Bishop GA, Billadeau DD, Peng KW, Giles F,  
922 Schmitt DM, Witzig TE. 2019. Targeting glycogen synthase kinase 3 for  
923 therapeutic benefit in lymphoma. *Blood* **134**:363–373.  
924 doi:10.1182/blood.2018874560

925 Young RM, Staudt LM. 2013. Targeting pathological B cell receptor signalling in

926 lymphoid malignancies. *Nat Rev Drug Discov* **12**:229–243.  
927 doi:10.1038/nrd3937  
928  
929  
930  
931

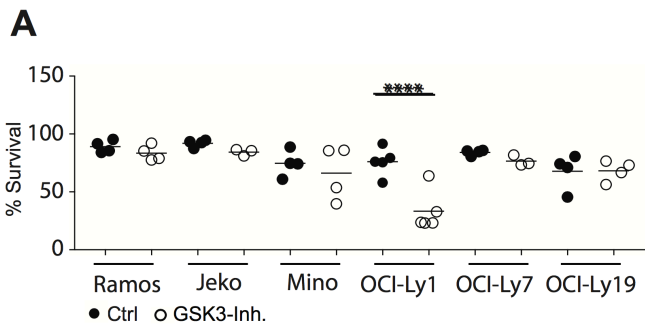

**Figure S1.: Survival of lymphoma cells after GSK3 inhibition**

A) The indicated lymphoma cell lines were treated with LY2090314 for one day. The percentage of viable cells was determined using forward and side scatter. Circles represent independent experiments. UT= untreated cells GSK3-I= cells treated with LY2090314.

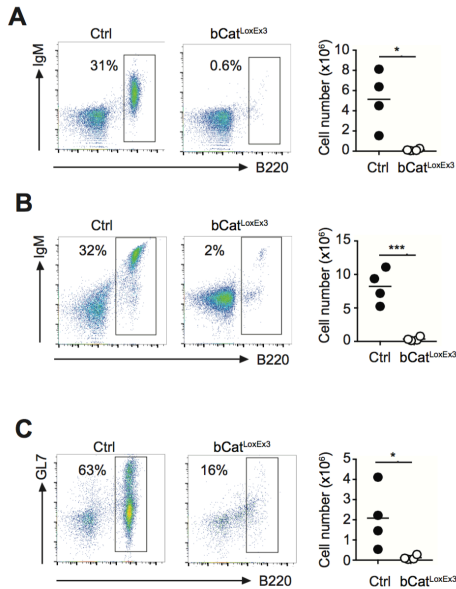

**Figure S2.: Accumulation of  $\beta$ -catenin results in a loss of mature B cells in the periphery**

The frequency of B cells (B220+) in lymphoid organs from *Mb1-cre x Catnb lox(ex3)* mice was analyzed by flow cytometry. Shown are representative plots (left) and the summary of absolute B cell numbers obtained in 4 independent experiments (right) from peripheral lymph nodes A) mesenteric lymph nodes B) and Payer's patches (C). Statistical significance was determined using the unpaired t test. \*p=0.012, \*\*\*p=0.0009, \*p=0.0421

Circles represent independent experiments. Ctrl= control mice, bCatloxEx3 = Cre positive mice carrying the *Catnb lox(ex3)* locus.

**Supplementary Table legend:**

**Table S1.: Accumulation of  $\beta$ -catenin changes the transcription profile of B cell precursors**

The transcription profile of *Mb1-cre x Catnb lox(ex3)* and control B cell precursors and the transcription profile of normal B cell precursors cultured with or without LY2090314 over night was analyzed. The table lists genes for which transcription was significantly increased in *Mb1-cre x Catnb lox(ex3)* B cell precursors in comparison to control B cell precursors and genes significantly increased in LY2090314 treated B cell precursors in comparison to untreated B cell precursors.

**Table S2.: Genes overexpressed in both GSK3-inhibited and *Catnb lox(ex3)* B cell precursors**

The transcription profile of *Mb1-cre x Catnb lox(ex3)* and control B cell precursors and the transcription profile of normal B cell precursors cultured with or without LY2090314 over night was analyzed. The table lists genes for which transcription was significantly increased in both *Mb1-cre x Catnb lox(ex3)* B cell precursors in comparison to control B cell precursors and in LY2090314 treated B cell precursors in comparison to untreated B cell precursors.

**Table S3.: Genes overexpressed in both GSK3-inhibited and *Catnb lox(ex3)* B cell precursors are involved in various biological processes**

The transcription profile of *Mb1-cre x Catnb lox(ex3)* and control B cell precursors and the transcription profile of normal B cell precursors cultured with or without LY2090314 over night was analyzed. To give a broad overview of biological processes the genes overexpressed in both *Mb1-cre x Catnb lox(ex3)* and GSK3 inhibited cells are involved in, we performed a PANTHER overrepresentation analysis. The table lists biological processes in which the overexpressed genes are involved.

**Sources data:**

The sources data include numerical values underlying graphs shown in Fig.1, Fig.1S, Fig.2K, Fig.4 Fig.5, Fig6H and Fig.2S. This file is labeled "Fig1\_2\_4\_5\_6- source data". The source data also include the original uncropped western blot pictures. The



pictures are labeled with the number of the figure and the antibody that was used in the last step. For membranes that have been cut and for which the picture shows several parts incubated with different antibodies, the name of the figure reflects the antibody relevant for the paper. In addition, pdf files are included showing western blots as presented in the figures together with uncut versions indicating the relevant lines with an asterisk. These files also include additional repeats of the representative examples shown in the manuscript. The western blots shown in the manuscript are labeled with the number and letter of the respective figure legend, the repeats are labeled as “repeat”.
